# Supplementary material for: Single-cell atlas of prawn gonads identifies NLRP2 regulated mitochondrial dysfunction in estrogen induced sex reversal
Source: Research Square preprint supplement (doi:10.21203/rs.3.rs-8343381/v1), 2025-12-31
Supplement: Supplementary file 1 [file 018f45a9fc1725f413ec4cf8.xlsx]

## Sheet: table
Table.S2 Percentage of cells in each clusters for each sample
Cluster	female	male	neo-female	total	percent
0	4174 (41.55%)	316 (3.18%)	1488 (12.18%)	5978	0.185721
1	1280 (12.74%)	1942 (19.56%)	616 (5.04%)	3838	0.119237
2	839 (8.35%)	961 (9.68%)	1997 (16.35%)	3797	0.117963
3	336 (3.34%)	424 (4.27%)	2326 (19.04%)	3086	0.0958742
4	165 (1.64%)	1643 (16.55%)	1 (0.01%)	1809	0.0562011
5	283 (2.82%)	299 (3.01%)	1162 (9.51%)	1744	0.0541817
6	272 (2.71%)	197 (1.98%)	1128 (9.23%)	1597	0.0496148
7	706 (7.03%)	382 (3.85%)	156 (1.28%)	1244	0.0386479
8	141 (1.4%)	932 (9.39%)	104 (0.85%)	1177	0.0365664
9	360 (3.58%)	681 (6.86%)	84 (0.69%)	1125	0.0349509
10	147 (1.46%)	181 (1.82%)	711 (5.82%)	1039	0.0322791
11	367 (3.65%)	124 (1.25%)	542 (4.44%)	1033	0.0320927
12	140 (1.39%)	158 (1.59%)	708 (5.8%)	1006	0.0312539
13	93 (0.93%)	453 (4.56%)	64 (0.52%)	610	0.0189512
14	56 (0.56%)	125 (1.26%)	197 (1.61%)	378	0.0117435
15	37 (0.37%)	266 (2.68%)	33 (0.27%)	336	0.0104387
16	45 (0.45%)	58 (0.58%)	209 (1.71%)	312	0.00969305
17	179 (1.78%)	59 (0.59%)	33 (0.27%)	271	0.00841929
18	16 (0.16%)	89 (0.9%)	162 (1.33%)	267	0.00829502
19	103 (1.03%)	38 (0.38%)	126 (1.03%)	267	0.00829502
20	19 (0.19%)	50 (0.5%)	185 (1.51%)	254	0.00789114
21	92 (0.92%)	22 (0.22%)	131 (1.07%)	245	0.00761153
22	52 (0.52%)	161 (1.62%)	32 (0.26%)	245	0.00761153
23	44 (0.44%)	170 (1.71%)	5 (0.04%)	219	0.00680378
24	49 (0.49%)	104 (1.05%)	5 (0.04%)	158	0.00490866
25	50 (0.5%)	93 (0.94%)	10 (0.08%)	153	0.00475332
10045	9928	12215	32188	total	1
