# Supplementary material for: Single-cell atlas of prawn gonads identifies NLRP2 regulated mitochondrial dysfunction in estrogen induced sex reversal
Source: Research Square preprint supplement (doi:10.21203/rs.3.rs-8343381/v1), 2025-12-31
Supplement: Supplementary file 2 [file 082cf3b510dc445594e21d03.xlsx]

## Sheet: Sheet1
Table. S3: Sequences of probes and primers used.
Primer name	Sequence(5′→ 3′)	Description
MLC2	5-DIG-TTGAACTCAGCCACCTGCTTCTGG	probe sequence for MLC2
VWDE	5-DIG-CCAGCCTTCACCTTGTTTTCGTCATTATCATCCG	probe sequence for VWDE
PF13	5-DIG-CAGCCAAATCCTCTCTCAAATGTTTCACTTCCTC	probe sequence for PF13
Phc-2	5-DIG-TCACGGGTGGCTGTTTCAAAGTGTTCCATTAC	probe sequence for Phc-2
GABARAP	5-DIG-CAATCCAGGTGCTTGCCTCTCAGGTAGTAGTTCA	probe sequence for GABARAP
PPAF2	5-DIG-CAGAGATGCTCCACACACATACAGGT	probe sequencer for PPAF2
Gsp-1	5-DIG-ATGGTCTCCAGCGACTGCTTTCCTCTATCAAC	probe sequence for Gsp-1
A1i3	5-DIG-AAATCAGTTCTTGGGTTACTTTCGTCGGTCTCTA	probe sequence for A1i3
MLC2-F	TCAAGGAGGGCTTCCAGATAATG	FWD primer for MLC2
MLC2-R	ACGACATCGTCATCATCAGACTC	RVS primer for MLC2
VWDE- F	TCAGAGTCCATTCCTTTGGTCAG	FWD primer forVWDE
VWDE- R	TCAAGGGTTTGTCTCTGTCTAGC	RVS primer for VWDE
PF13-F	ACATTCAAAGAGACGCACGAAAG	FWD primer forPF13
PF13-R	ACTCTGCATATCCCTGTCCTTTG	RVS primer for PF13
Phc-2-F	ATAGCCTTCCTCCCTACACTCAT	FWD primer for Phc-2
Phc-2-R	CAAAGGAGAAGTCGTTGTGGTTC	RVS primer for Phc-2
GABARAP-F	ACAGATGAGGACACTGTAGAGGA	FWD primer for GABARAP
GABARAP-R	GGCGAGATGAAGAAAATACTGCG	RVS primer for GABARAP
PPAF2-F	TGTGGAGTAATCCCACTTGTCAG	FWD primer for PPAF2
PPAF2-R	GTCTCCATGATCCATTCCTCGAA	RVS primer for PPAF2
Gsp1-F	TCCTCGGAGACTACGTTGATAGA	FWD primer for Gsp1
Gsp1-R	TCCACCGTGCATACATAGGATTG	RVS primer for Gsp1
A1i3-F	GTCACGAAACAGGTGGAATTCTG	FWD primer for A1i3
A1i3-R	CACGGTGACTTCACGTATTATGC	RVS primer for A1i3
