# Supplementary material for: Single-cell atlas of prawn gonads identifies NLRP2 regulated mitochondrial dysfunction in estrogen induced sex reversal
Source: Research Square preprint supplement (doi:10.21203/rs.3.rs-8343381/v1), 2025-12-31
Supplement: Supplementary file 3 [file 09e3b3938c9fd5ee587e2057.xlsx]

## Sheet: table
Table.S4 Percentage of each germ cell in each group
Cluster	female	male	neo-female	total
Unknown	4751 (47.30%)	7068 (71.20%)	7521(61.57%)	19340
Ovum	4292 (42.73%)	395 (3.98%)	1626 (13.31%)	6313
Secondary_spermatocyte	53 (0.53%)	107 (1.08%)	5 (0.04%)	165
Oogonium	285 (2.84%)	213 (2.15%)	1136 (9.3%)	1634
Secondary_oocyte	177 (1.76%)	210 (2.12%)	722 (5.91%)	1109
Primary_oocyte	127 (1.26%)	144 (1.45%)	667 (5.46%)	938
Spermaton	78 (0.78%)	296 (2.98%)	378 (3.09%)	752
Primary_spermatocyte	62 (0.62%)	203 (2.04%)	5 (0.04%)	270
Sperm	220 (2.19%)	1292 (13.01%)	155 (1.27%)	1667
total	10045	9928	12215	32188
