# Supplementary material for: Single-cell atlas of prawn gonads identifies NLRP2 regulated mitochondrial dysfunction in estrogen induced sex reversal
Source: Research Square preprint supplement (doi:10.21203/rs.3.rs-8343381/v1), 2025-12-31
Supplement: Supplementary file 4 [file 405068643f04ac2e269b7b2b.xlsx]

## Sheet: Sheet1
Table.S1 Weight change in 60 days for male, female and neo-female
Group	Day1 (g)	Day15 (g)	Day30 (g)	Day45 (g)	Day60 (g)
male	0.08 ± 0.01	0.37 ± 0.05	0.77 ± 0.05	1.32 ± 0.42	1.92 ± 0.55
female	0.08 ± 0.01	0.35 ± 0.01	0.48 ± 0.05	0.99 ± 0.12	1.33 ± 0.20
neo-feamale	0.08 ± 0.01	0.20 ± 0.01	0.35 ± 0.05	0.70 ± 0.05	0.93 ± 0.11
