# Supplementary material for: Single-cell atlas of prawn gonads identifies NLRP2 regulated mitochondrial dysfunction in estrogen induced sex reversal
Source: Research Square preprint supplement (doi:10.21203/rs.3.rs-8343381/v1), 2025-12-31
Supplement: Supplementary file 5 [file ea3b6289cd2f3592a0524fc2.xlsx]

## Sheet: Sheet1
Table. S5: Sequences of primers used.
Primer name	Sequence(5′→ 3′)	Description
NLRP-RTF	TCTGATGTATCTCAATGGCCGAG	FWD primer for NLRP
NLRP-RTR	AGAGCAGACTTGGGATTTTCCTT	RVS primer for NLRP
NdufB3-RTF	GTGGAGGAGCCCCTTATAAAGTT	FWD primer for NdufB3
NdufB3-RTR	CATGAGCATCCTGTCCACTACTT	RVS primer for NdufB3
SDHC-RTF	TTCCTACTAGATTGGACGGGTCT	FWD primer for SDHC
SDHC-RTR	CTCCTTACCTTCCAACTGACGAA	RVS primer for SDHC
QCR8-RTF	GCAACGAAATCAGAAACAGGAGG	FWD primer for QCR8
QCR8-RTR	CGGAGAGATGGAGAACTTGATGA	RVS primer for QCR8
Cyc1-RTF	ATCCTTACTTTGTTGGAGGTGCT	FWD primer for Cyc1
Cyc1-RTR	TTGTAGGCAATCTTCCTGCTCTT	RVS primer for Cyc1
cyc-RTF	CAAGCGTGTAACAGGAGGAAAAC	FWD primer for cyc
cyc-RTR	CCTTAGGTAAGCGATGAGATCGG	RVS primer for cyc
Nurf38-RTF	GGCTCTTTGATGTGTTTGTCGAA	FWD primer for Nurf38
Nurf38-RTR	AAGGGCTCCATAGTTCCAAATGT	RVS primer for Nurf38
ATPsynO-RTF	TACAGGACGGAACAAGAAGGAAG	FWD primer for ATPsynO
ATPsynO-RTR	TCTTTGTCGACAGCATCAAGAGA	RVS primer for ATPsynO
AAEL-RTF	ATTGCATGAAGCCAGACAGAAAC	FWD primer for AAEL
AAEL-RTR	AAAGTGTTTGAGACCTTGATGCG	RVS primer for AAEL
EIF-RTF	GTTGTATGCAGTCGGCCATATTT	FWD primer for EIF
EIF-RTR	TGTCCTGAAGGTGGTGATAATGA	RVS primer for EIF
dsNLRP2-F	TAATACGACTCACTATAGGGAGCTGACAGAACGCCTGATT	Double stranded primer for NLRP
dsNLRP2-R	TAATACGACTCACTATAGGGCTGTGGATCCATTCTCCGTT	Double stranded primer for NLRP
